# Supplementary material
Source: PubMed Central journal article supplement (PMC380993)

### **Supplementary Figure 1**

DNase 1 protection analysis of DmORC binding to ACE-3. Increasing concentrations of DmORC purified from tissue culture nuclear extract (lanes 2-6), 0-12 hour embryo nuclear extract (lanes 7-11), or rDmORC (lanes 12-16) were bound to a radiolabeled fragment containing ACE-3 and subjected to DNase 1 nuclease cleavage followed by DNA sequencing gel analysis Lane 1, no protein.

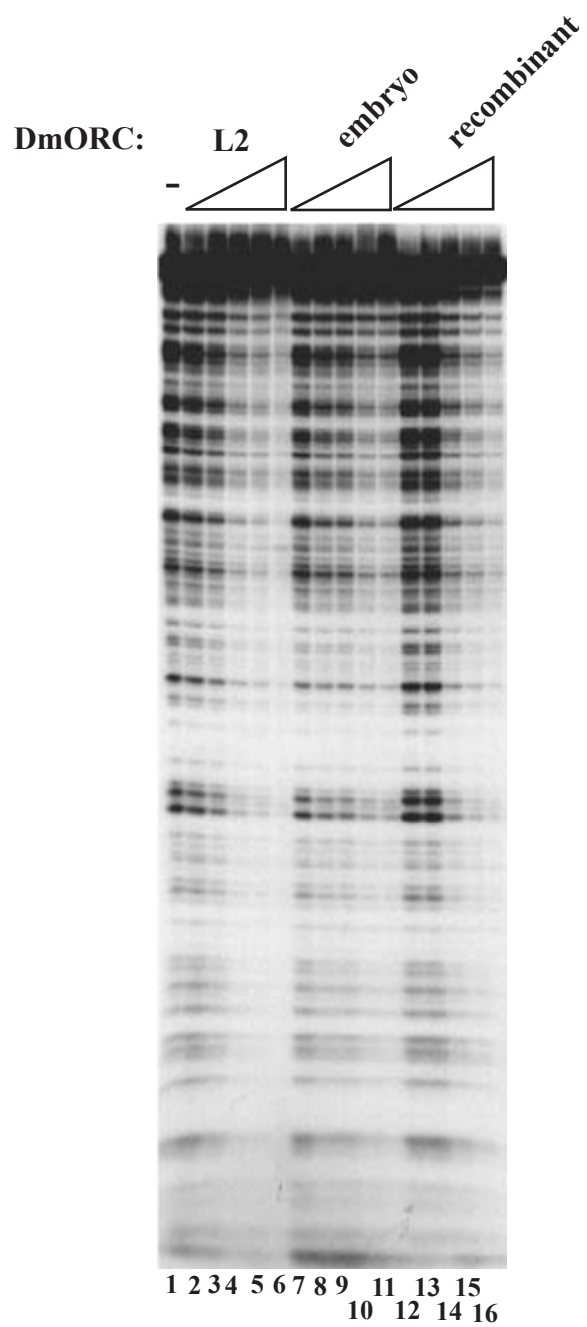

Supplement: 7600077s1.pdf [file 7600077s1.pdf]
