# Supplementary material
Source: PubMed Central journal article supplement (PMC380993)
Supplement: 7600077s3.pdf [file 7600077s3.pdf]

## Supplementary Materials

Third chorion locus fragment positions relative to the 5' end of the s18 ORF:

ACE-U2, -1287 to -984; ACE-U1, -1000 to -671; ACE-3, -691 to -340; ACE-D, -363 to -5; s18-1, -31 to +291; s18-2, +272 to +602; s18-3, +583 to +904; ori- $\beta$ , +886 to +1210; ori-D, +1192 to 1536; s15-1, +1518 to +1832; s15-2, +1813 to +2133. The vector control DNA is located at +2575 to +2866 relative to the s18 ORF in the pT2 construct.

Primer pairs used to amplify respective fragments:

ACE-U2: 5'-GTATGCATTGCTTGACGC-3'; 5'-CGACACGTTTGGGCCAG-3'.

ACE-U1: 5'-CTGGCCCAAACGTGTCG-3'; 5'-CCAGCATCCAGTAGCCAGAAG-3'.

ACE-3: 5'-CTTCTGGCTACTGGATGCTGG-3'; 5'-GCTCCGGATCCGCATAGTTTCG-3'

ACE-D: 5'-CGAAACTATGCGGATCCGGAGCACG-3'; 5'-GGCTGAGTTGGTTAGTTGATC  
GATGCG-3'.

S18-1: 5'-CGATCAACTAACCAACTCAGCC-3'; 5'-CCTGGTAGGCATAGCCACCG-3'.

S18-2: 5'-CGGTGGCTATGCCTACCAGG-3'; 5'-GTACTCCTGGTTCACGTAGC-3'.

S18-3: 5'-GCTACGTGAACCAGGAGTAC-3'; 5'-GGCTCAAAGTATCGCTTGGC-3'.

ORI- $\beta$ : 5'-CCAAGCGATACTTTGAGCC-3'; 5'-GTGATTACTAGTCACATAC-3'.

ORI-D: 5'-GTATGTGACTAGTAATCAC-3'; 5'-CGGCTGGAATATACTCAC-3'.

S15-1: 5'-GTGAGTATATCCAGCCG-3'; 5'-CGTACGCTGGGCTGGCGTTG-3'.

S15-2: 5'-CAACGCCAGCCCAGCGTACG-3'; 5'-CACTGCCGATGAAGCGAG-3'.

PT2 vector control: 5'-CAGTTGCGCAGCCTGAATGGC-3'; 5'-ATAGGCGTATCAC  
GAGGC-3'.
